# Supplementary material
Source: PubMed Central journal article supplement (PMC10269536)
Supplement: spectrum.00182-23-s0001.pdf [file spectrum.00182-23-s0001.pdf]

**TABLE S1.** List of strains in the study, including additional metadata where available.

| Strain                            | Serogroup | Serotype | Biotype   | ctxB allele | Year | Location           | Origin        | Source |
|-----------------------------------|-----------|----------|-----------|-------------|------|--------------------|---------------|--------|
| <i>Vibrio cholerae</i>            |           |          |           |             |      |                    |               |        |
| 2010EL-1786 <sup>a,b,c</sup>      | O1        | Ogawa    | El Tor    | ctxB7       | 2010 | Haiti              | NA            | NA     |
| 2016V-1085 <sup>a,b,c</sup>       | O141      | NA       | NA        | ctxB1       | 2016 | New Mexico, USA    | Human isolate | Stool  |
| 3528-08 <sup>a,b,c</sup>          | NAG       | NA       | NA        | ctxB1       | 2008 | Gulf Coast TX, USA | Human isolate | Stool  |
| 3566-08 <sup>a,b,c</sup>          | O141      | NA       | NA        | ctxB1       | 2008 | NJ, USA            | Human isolate | Stool  |
| 3569-08 <sup>a,b,c</sup>          | O1        | Inaba    | El Tor    | ctxB1       | 2008 | Gulf Coast LA, USA | Human isolate | Stool  |
| BX 330286 <sup>a,b</sup>          | O1        | Inaba    | NA        | ctxB2       | 1986 | Australia          | NA            | NA     |
| 2011V-1043 <sup>a,b,c</sup>       | O75       | NA       | NA        | ctxB1       | 2011 | FL, USA            | Human isolate | Stool  |
| MJ1236 <sup>a</sup>               | O1        | Inaba    | El Tor    | NA          | 1994 | Bangladesh, India  | NA            | NA     |
| N16961 <sup>a,b</sup>             | O1        | NA       | El Tor    | ctxB3       | 1975 | Bangladesh, India  | Human isolate | Stool  |
| O395 <sup>a,b,c</sup>             | O1        | Ogawa    | Classical | ctxB1       | 1965 | India              | NA            | NA     |
| V51 <sup>a,b,c</sup>              | O141      | NA       | NA        | ctxB1       | 1987 | USA                | NA            | NA     |
| V52 <sup>a,b,c</sup>              | O37       | NA       | NA        | ctxB9       | 1968 | Sudan              | NA            | NA     |
| 3541-04 <sup>a,b,c</sup>          | O75       | NA       | NA        | ctxB1       | 2004 | GA, USA            | Human isolate | NA     |
| E506 <sup>a,b</sup>               | O1        | NA       | El Tor    | ctxB1       | 1974 | Texas, USA         | NA            | NA     |
| F9993 <sup>a</sup>                | O139      | NA       | NA        | NA          | NA   | NA                 | NA            | NA     |
| IEC224 <sup>a</sup>               | O1        | NA       | El Tor    | NA          | 1994 | Belem, Brazil      | Human isolate | Stool  |
| MS6 <sup>a</sup>                  | O1        | NA       | El Tor    | NA          | NA   | NA                 | NA            | NA     |
| K2802 <sup>a</sup>                | O141      | NA       | NA        | NA          | NA   | NA                 | NA            | NA     |
| 2470-80 <sup>a</sup>              | O1        | NA       | NA        | ctxB1       | NA   | NA                 | NA            | NA     |
| 365-96 <sup>b,c,d,e</sup>         | O27       | NA       | NA        | ctxB8       | NA   | NA                 | NA            | NA     |
| ATCC 25872 (280 NAG) <sup>c</sup> | O37       | NA       | NA        | NA          | NA   | NA                 | NA            | NA     |
| CIRS101 <sup>b</sup>              | O1        | Inaba    | El Tor    | NA          | 2002 | Bangladesh, India  | NA            | NA     |
| <i>Vibrio mimicus</i>             |           |          |           |             |      |                    |               |        |
| M1567 (523-80) <sup>c,f</sup>     | NA        | NA       | NA        | NA          | NA   | NA                 | NA            | NA     |
| 06-2455 <sup>c</sup>              | NA        | NA       | NA        | NA          | NA   | NA                 | NA            | NA     |
| 2011V-1073 <sup>c</sup>           | NA        | NA       | NA        | NA          | NA   | NA                 | NA            | NA     |

<sup>a</sup>Strains included in the core genome SNP phylogeny

<sup>b</sup>Strains included in the *ctxAB* phylogeny

<sup>c</sup>Strains included in the *tcpA* phylogeny

<sup>d</sup>NCBI accession number for 365-96 *ctxAB* sequence is AF390572.1

<sup>e</sup>NCBI accession number for 365-96 *tcpA* sequence is AF390571.1

<sup>f</sup>NCBI accession number for M1567 (523-80) *tcpA* sequence is FJ209007.1







|                                       |                                                                                 |        |
|---------------------------------------|---------------------------------------------------------------------------------|--------|
| #3528-08_NAG_ctxAB_-_ctxB1_allele     | AGG GGC TAC AGA GAT AGA TAT TAC AGT AAC TTA GAT ATT GCT CCA GCA GCA GAT GGT TAT | [ 540] |
| #2016V-1085_O141_ctxAB_-_ctxB1_allele | ...                                                                             | [ 540] |
| #3566-08_O141_ctxAB_-_ctxB1_allele    | ...                                                                             | [ 540] |
| #V51_O141_ctxAB_-_ctxB1_allele        | ...                                                                             | [ 540] |
| #2011V-1043_O75_ctxAB_-_ctxB1_allele  | ...                                                                             | [ 540] |
| #3541-04_O75_ctxAB_-_ctxB1_allele     | ...                                                                             | [ 540] |
| #3569-08_O1_GC_ctxAB_-_ctxB1_allele   | ...                                                                             | [ 540] |
| #E506_O1_GC_-_ctxB1_allele            | ...                                                                             | [ 540] |
| #O395_O1_ctxAB_-_ctxB1_allele         | ...                                                                             | [ 540] |
| #CIRS101_O1_ctxAB_-_ctxB1_allele      | ...                                                                             | [ 540] |
| #N16961_O1_ctxAB_-_ctxB3_allele       | ...                                                                             | [ 540] |
| #2010EL-1786_O1_ctxAB_-_ctxB7_allele  | ...                                                                             | [ 540] |
| #365-96_O27_cxtAB_-_ctxB8_allele      | ...                                                                             | [ 540] |
| #V52_O37_ctxAB_-_ctxB9_allele         | ...                                                                             | [ 540] |
| #BX_330286_O1_ctxAB_-_ctxB2_allele    | ...                                                                             | [ 540] |
|                                       |                                                                                 |        |
| #3528-08_NAG_ctxAB_-_ctxB1_allele     | GGA TTG GCA GGT TTC CCT CCG GAG CAT AGA GCT TGG AGG GAA GAG CCG TGG ATT CAT CAT | [ 600] |
| #2016V-1085_O141_ctxAB_-_ctxB1_allele | ...                                                                             | [ 600] |
| #3566-08_O141_ctxAB_-_ctxB1_allele    | ...                                                                             | [ 600] |
| #V51_O141_ctxAB_-_ctxB1_allele        | ...                                                                             | [ 600] |
| #2011V-1043_O75_ctxAB_-_ctxB1_allele  | ...                                                                             | [ 600] |
| #3541-04_O75_ctxAB_-_ctxB1_allele     | ...                                                                             | [ 600] |
| #3569-08_O1_GC_ctxAB_-_ctxB1_allele   | ...                                                                             | [ 600] |
| #E506_O1_GC_-_ctxB1_allele            | ...                                                                             | [ 600] |
| #O395_O1_ctxAB_-_ctxB1_allele         | ...                                                                             | [ 600] |
| #CIRS101_O1_ctxAB_-_ctxB1_allele      | ...                                                                             | [ 600] |
| #N16961_O1_ctxAB_-_ctxB3_allele       | ...                                                                             | [ 600] |
| #2010EL-1786_O1_ctxAB_-_ctxB7_allele  | ...                                                                             | [ 600] |
| #365-96_O27_cxtAB_-_ctxB8_allele      | ...                                                                             | [ 600] |
| #V52_O37_ctxAB_-_ctxB9_allele         | ...                                                                             | [ 600] |
| #BX_330286_O1_ctxAB_-_ctxB2_allele    | ... .T .C                                                                       | [ 600] |
|                                       |                                                                                 |        |
| #3528-08_NAG_ctxAB_-_ctxB1_allele     | GCA CCG CCG GGT TGT GGG AAT GCT CCA AGA TCA TCG ATG AGT AAT ACT TGC GAT GAA AAA | [ 660] |
| #2016V-1085_O141_ctxAB_-_ctxB1_allele | ...                                                                             | [ 660] |
| #3566-08_O141_ctxAB_-_ctxB1_allele    | ...                                                                             | [ 660] |
| #V51_O141_ctxAB_-_ctxB1_allele        | ...                                                                             | [ 660] |
| #2011V-1043_O75_ctxAB_-_ctxB1_allele  | ...                                                                             | [ 660] |
| #3541-04_O75_ctxAB_-_ctxB1_allele     | ...                                                                             | [ 660] |
| #3569-08_O1_GC_ctxAB_-_ctxB1_allele   | ...                                                                             | [ 660] |
| #E506_O1_GC_-_ctxB1_allele            | ...                                                                             | [ 660] |
| #O395_O1_ctxAB_-_ctxB1_allele         | ...                                                                             | [ 660] |
| #CIRS101_O1_ctxAB_-_ctxB1_allele      | ...                                                                             | [ 660] |
| #N16961_O1_ctxAB_-_ctxB3_allele       | ...                                                                             | [ 660] |
| #2010EL-1786_O1_ctxAB_-_ctxB7_allele  | ...                                                                             | [ 660] |
| #365-96_O27_cxtAB_-_ctxB8_allele      | ...                                                                             | [ 660] |
| #V52_O37_ctxAB_-_ctxB9_allele         | ...                                                                             | [ 660] |
| #BX_330286_O1_ctxAB_-_ctxB2_allele    | ...                                                                             | [ 660] |

|                                      |                                                                                 |        |
|--------------------------------------|---------------------------------------------------------------------------------|--------|
| #3528-08_NAG_ctxAB_-ctxB1_allele     | ACC CAA AGT CTA GGT GTA AAA TTC CTT GAC GAA TAC CAA TCT AAA GTT AAA AGA CAA ATA | [ 720] |
| #2016V-1085_O141_ctxAB_-ctxB1_allele | ...                                                                             | [ 720] |
| #3566-08_O141_ctxAB_-ctxB1_allele    | ...                                                                             | [ 720] |
| #V51_O141_ctxAB_-ctxB1_allele        | ...                                                                             | [ 720] |
| #2011V-1043_O75_ctxAB_-ctxB1_allele  | ...                                                                             | [ 720] |
| #3541-04_O75_ctxAB_-ctxB1_allele     | ...                                                                             | [ 720] |
| #3569-08_O1_GC_ctxAB_-ctxB1_allele   | ...                                                                             | [ 720] |
| #E506_O1_GC_-ctxB1_allele            | ...                                                                             | [ 720] |
| #O395_O1_ctxAB_-ctxB1_allele         | ...                                                                             | [ 720] |
| #CIRS101_O1_ctxAB_-ctxB1_allele      | ...                                                                             | [ 720] |
| #N16961_O1_ctxAB_-ctxB3_allele       | ...                                                                             | [ 720] |
| #2010EL-1786_O1_ctxAB_-ctxB7_allele  | ...                                                                             | [ 720] |
| #365-96_O27_cxtAB_-ctxB8_allele      | ...                                                                             | [ 720] |
| #V52_O37_ctxAB_-ctxB9_allele         | ...                                                                             | [ 720] |
| #BX_330286_O1_ctxAB_-ctxB2_allele    | ... A...                                                                        | [ 720] |
| #3528-08_NAG_ctxAB_-ctxB1_allele     | TTT TCA GGC TAT CAA TCT GAT ATT GAT ACA CAT AAT AGA ATT AAG GAT GAA TTA TGA TTA | [ 780] |
| #2016V-1085_O141_ctxAB_-ctxB1_allele | ...                                                                             | [ 780] |
| #3566-08_O141_ctxAB_-ctxB1_allele    | ...                                                                             | [ 780] |
| #V51_O141_ctxAB_-ctxB1_allele        | ...                                                                             | [ 780] |
| #2011V-1043_O75_ctxAB_-ctxB1_allele  | ...                                                                             | [ 780] |
| #3541-04_O75_ctxAB_-ctxB1_allele     | ...                                                                             | [ 780] |
| #3569-08_O1_GC_ctxAB_-ctxB1_allele   | ...                                                                             | [ 780] |
| #E506_O1_GC_-ctxB1_allele            | ...                                                                             | [ 780] |
| #O395_O1_ctxAB_-ctxB1_allele         | ...                                                                             | [ 780] |
| #CIRS101_O1_ctxAB_-ctxB1_allele      | ...                                                                             | [ 780] |
| #N16961_O1_ctxAB_-ctxB3_allele       | ...                                                                             | [ 780] |
| #2010EL-1786_O1_ctxAB_-ctxB7_allele  | ...                                                                             | [ 780] |
| #365-96_O27_cxtAB_-ctxB8_allele      | ... G...                                                                        | [ 780] |
| #V52_O37_ctxAB_-ctxB9_allele         | ...                                                                             | [ 780] |
| #BX_330286_O1_ctxAB_-ctxB2_allele    | ...                                                                             | [ 780] |
| #3528-08_NAG_ctxAB_-ctxB1_allele     | AAT TAA AAT TTG GTG TTT TTT TTA CAG TTT TAC TAT CTT CAG CAT ATG CAC ATG GAA CAC | [ 840] |
| #2016V-1085_O141_ctxAB_-ctxB1_allele | ...                                                                             | [ 840] |
| #3566-08_O141_ctxAB_-ctxB1_allele    | ...                                                                             | [ 840] |
| #V51_O141_ctxAB_-ctxB1_allele        | ...                                                                             | [ 840] |
| #2011V-1043_O75_ctxAB_-ctxB1_allele  | ...                                                                             | [ 840] |
| #3541-04_O75_ctxAB_-ctxB1_allele     | ...                                                                             | [ 840] |
| #3569-08_O1_GC_ctxAB_-ctxB1_allele   | ...                                                                             | [ 840] |
| #E506_O1_GC_-ctxB1_allele            | ...                                                                             | [ 840] |
| #O395_O1_ctxAB_-ctxB1_allele         | ...                                                                             | [ 840] |
| #CIRS101_O1_ctxAB_-ctxB1_allele      | ...                                                                             | [ 840] |
| #N16961_O1_ctxAB_-ctxB3_allele       | ...                                                                             | [ 840] |
| #2010EL-1786_O1_ctxAB_-ctxB7_allele  | ... A...                                                                        | [ 840] |
| #365-96_O27_cxtAB_-ctxB8_allele      | ...                                                                             | [ 840] |
| #V52_O37_ctxAB_-ctxB9_allele         | ...                                                                             | [ 840] |
| #BX_330286_O1_ctxAB_-ctxB2_allele    | ...                                                                             | [ 840] |

Start of ctxB

End of ctxA





|                                       |                                                                                 |        |
|---------------------------------------|---------------------------------------------------------------------------------|--------|
| #3528-08_NAG_ctxAB_-_ctxB1_allele     | AAA AAG CGA TTG AAA GGA TGA AGG ATA CCC TGA GGA TTG CAT ATC TTA CTG AAG CTA AAG | [1080] |
| #2016V-1085_O141_ctxAB_-_ctxB1_allele | ...                                                                             | [1080] |
| #3566-08_O141_ctxAB_-_ctxB1_allele    | ...                                                                             | [1080] |
| #V51_O141_ctxAB_-_ctxB1_allele        | ...                                                                             | [1080] |
| #2011V-1043_O75_ctxAB_-_ctxB1_allele  | ...                                                                             | [1080] |
| #3541-04_O75_ctxAB_-_ctxB1_allele     | ...                                                                             | [1080] |
| #3569-08_O1_GC_ctxAB_-_ctxB1_allele   | ...                                                                             | [1080] |
| #E506_O1_GC_-_ctxB1_allele            | ...                                                                             | [1080] |
| #O395_O1_ctxAB_-_ctxB1_allele         | ...                                                                             | [1080] |
| #CIRS101_O1_ctxAB_-_ctxB1_allele      | ...                                                                             | [1080] |
| #N16961_O1_ctxAB_-_ctxB3_allele       | ...                                                                             | [1080] |
| #2010EL-1786_O1_ctxAB_-_ctxB7_allele  | ...                                                                             | [1080] |
| #365-96_O27_cxtAB_-_ctxB8_allele      | ...                                                                             | [1080] |
| #V52_O37_ctxAB_-_ctxB9_allele         | ...                                                                             | [1080] |
| #BX_330286_O1_ctxAB_-_ctxB2_allele    | ...                                                                             | [1080] |

|                                       |                                                                                 |        |
|---------------------------------------|---------------------------------------------------------------------------------|--------|
| #3528-08_NAG_ctxAB_-_ctxB1_allele     | TCG AAA AGT TAT GTG TAT GGA ATA ATA AAA CGC CTC ATG CGA TTG CCG CAA TTA GTA TGG | [1140] |
| #2016V-1085_O141_ctxAB_-_ctxB1_allele | ...                                                                             | [1140] |
| #3566-08_O141_ctxAB_-_ctxB1_allele    | ...                                                                             | [1140] |
| #V51_O141_ctxAB_-_ctxB1_allele        | ...                                                                             | [1140] |
| #2011V-1043_O75_ctxAB_-_ctxB1_allele  | ...                                                                             | [1140] |
| #3541-04_O75_ctxAB_-_ctxB1_allele     | ...                                                                             | [1140] |
| #3569-08_O1_GC_ctxAB_-_ctxB1_allele   | ...                                                                             | [1140] |
| #E506_O1_GC_-_ctxB1_allele            | ...                                                                             | [1140] |
| #O395_O1_ctxAB_-_ctxB1_allele         | ...                                                                             | [1140] |
| #CIRS101_O1_ctxAB_-_ctxB1_allele      | ...                                                                             | [1140] |
| #N16961_O1_ctxAB_-_ctxB3_allele       | ...                                                                             | [1140] |
| #2010EL-1786_O1_ctxAB_-_ctxB7_allele  | ...                                                                             | [1140] |
| #365-96_O27_cxtAB_-_ctxB8_allele      | ...                                                                             | [1140] |
| #V52_O37_ctxAB_-_ctxB9_allele         | ...                                                                             | [1140] |
| #BX_330286_O1_ctxAB_-_ctxB2_allele    | ...                                                                             | [1140] |

**End of *ctxB***

|                                       |            |        |
|---------------------------------------|------------|--------|
| #3528-08_NAG_ctxAB_-_ctxB1_allele     | CAA ATT AA | [1148] |
| #2016V-1085_O141_ctxAB_-_ctxB1_allele | ...        | [1148] |
| #3566-08_O141_ctxAB_-_ctxB1_allele    | ...        | [1148] |
| #V51_O141_ctxAB_-_ctxB1_allele        | ...        | [1148] |
| #2011V-1043_O75_ctxAB_-_ctxB1_allele  | ...        | [1148] |
| #3541-04_O75_ctxAB_-_ctxB1_allele     | ...        | [1148] |
| #3569-08_O1_GC_ctxAB_-_ctxB1_allele   | ...        | [1148] |
| #E506_O1_GC_-_ctxB1_allele            | ...        | [1148] |
| #O395_O1_ctxAB_-_ctxB1_allele         | ...        | [1148] |
| #CIRS101_O1_ctxAB_-_ctxB1_allele      | ...        | [1148] |
| #N16961_O1_ctxAB_-_ctxB3_allele       | ...        | [1148] |
| #2010EL-1786_O1_ctxAB_-_ctxB7_allele  | ...        | [1148] |
| #365-96_O27_cxtAB_-_ctxB8_allele      | ...        | [1148] |
| #V52_O37_ctxAB_-_ctxB9_allele         | ...        | [1148] |
| #BX_330286_O1_ctxAB_-_ctxB2_allele    | ...        | [1148] |

**FIG S2.** Evidence of mutations in NAG O-Antigen. Whole genome alignment with Mauve 2.4.0 shows O-antigen regions of the NAG strain 3528-08 (top), O141 reference strain 3566-08, and O75 Cluster I and II reference strains 3541-04 and 2011V-1043 (bottom), and the location of mutations in the NAG strain O-antigen region - an unknown gene that is *wbfA-like* and the *pglJ* gene. O-antigen junction genes *gmhD* and *rjg* are labeled in red and blue, respectively. The O-antigen region lengths are listed in base pairs (bp). Note that the coordinates of these regions are reverse-complemented to display the O-antigen region with *gmhD* on the 5' end and *rgj* on the 3' end of the of the gene cluster. The *wbfA-like* gene and *pglJ* gene are also present in O75 as denoted in the figure.

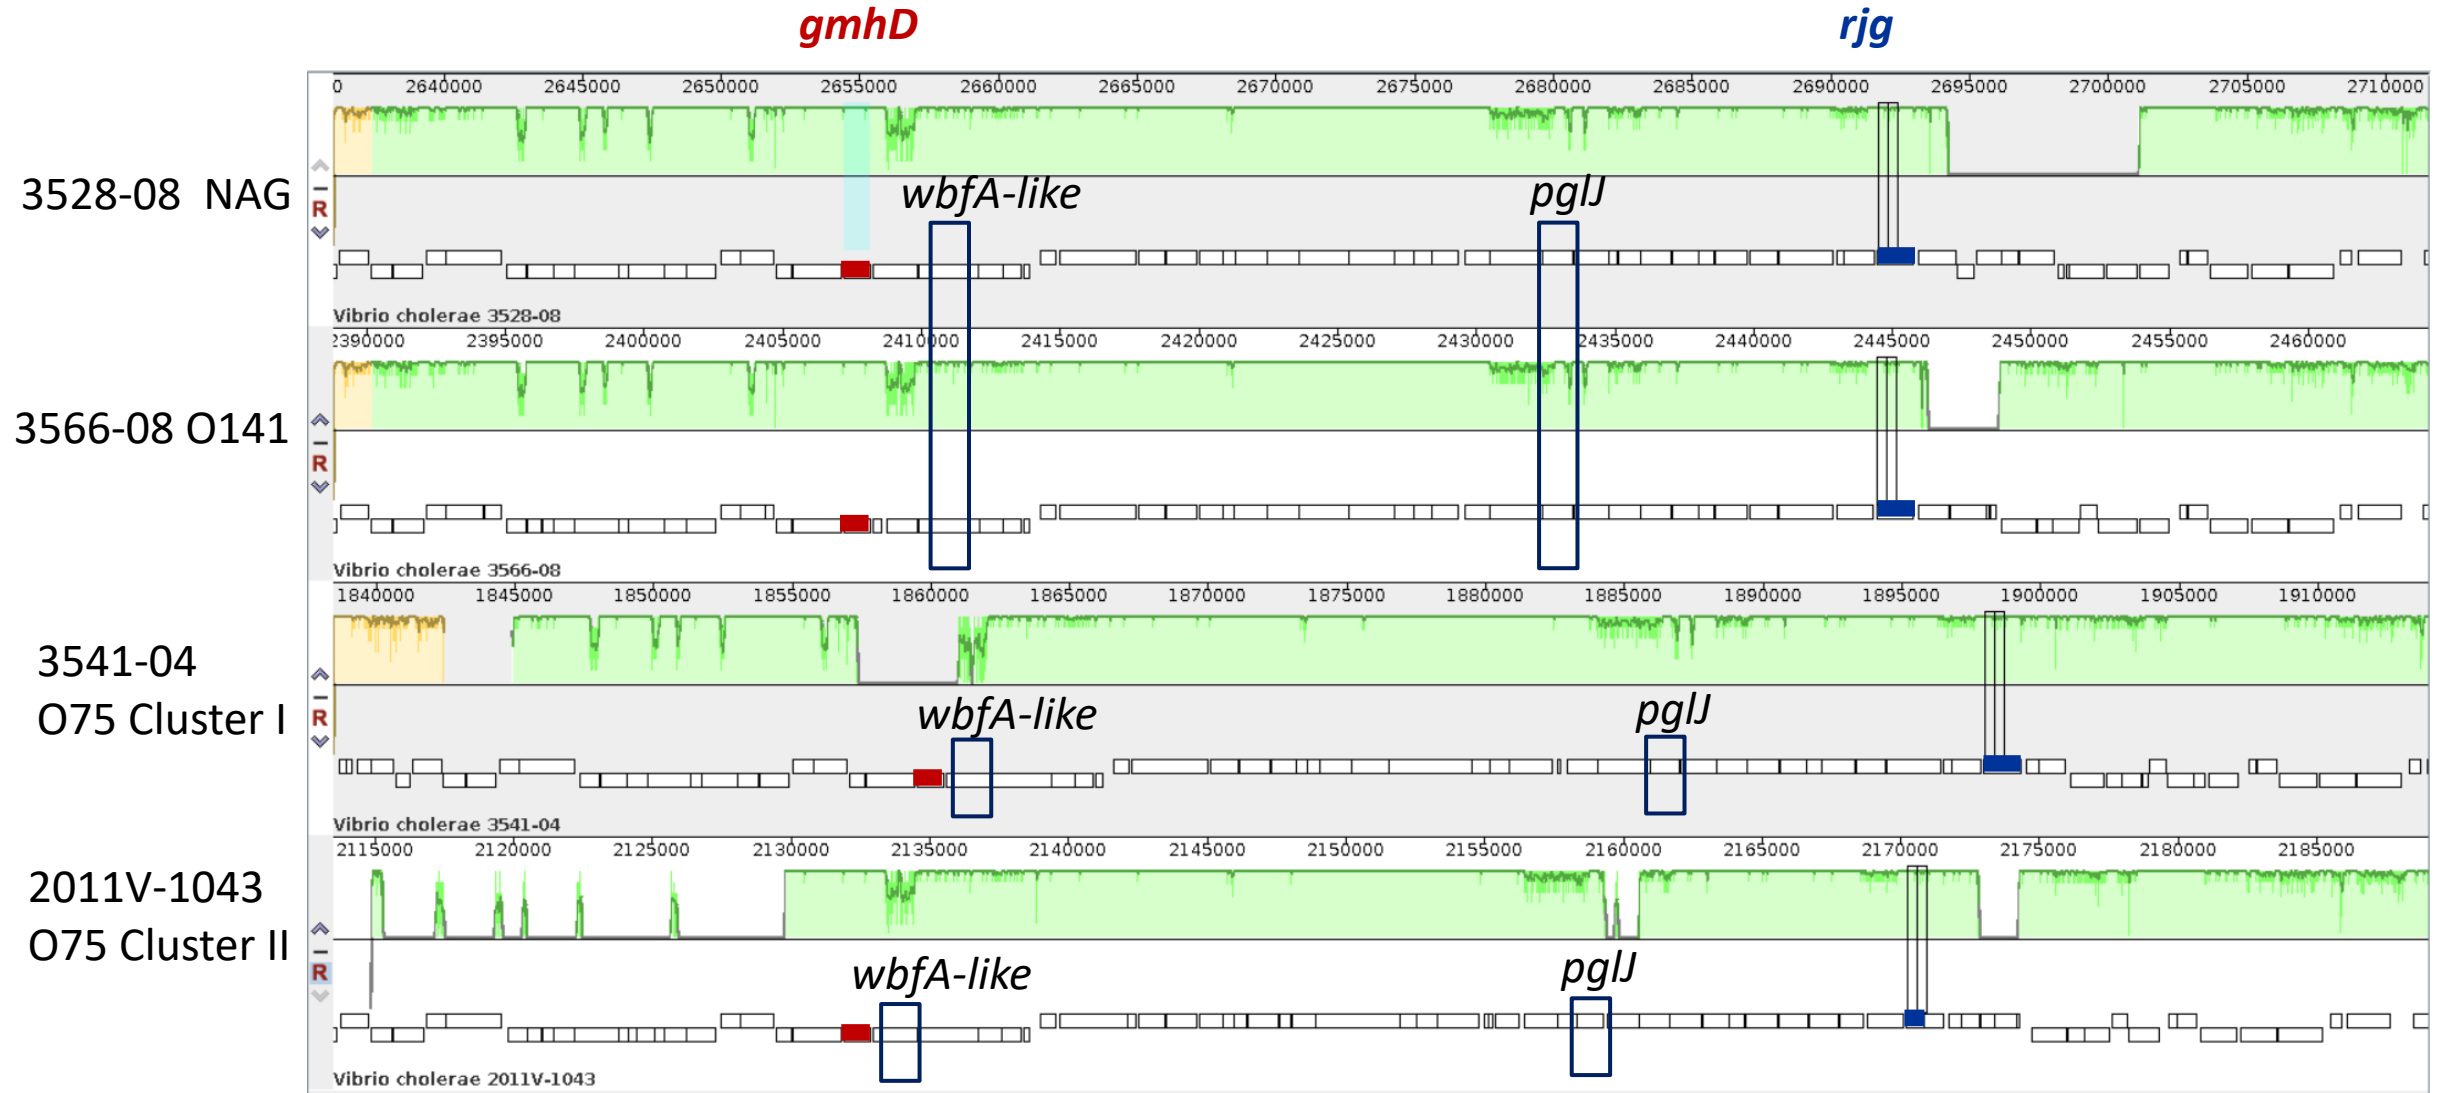

**FIG S3.** Nucleotide alignment of the *wbfA*-like gene (1518 bp) from the O141 reference strain (3566-08) compared to a sequence from the putative O-antigen gene of the NAG strain (3528-08). Mutations in the NAG O-antigen gene occur at positions 964 bp (single base insertion of a C nucleotide), 1002 bp (C>T), and at 1036 bp (insertion of 483 bp). “.” = indicates identical bases and “-” indicates an indel.

|         |     |     |     |             |     |     |     |     |     |     |     |     |     |     |     |              |     |     |     |     |     |     |     |     |     |     |     |     |     |     |        |        |
|---------|-----|-----|-----|-------------|-----|-----|-----|-----|-----|-----|-----|-----|-----|-----|-----|--------------|-----|-----|-----|-----|-----|-----|-----|-----|-----|-----|-----|-----|-----|-----|--------|--------|
| 3566-08 | ATG | CAT | AAA | CCA         | ACC | ATT | TCT | AGT | GTA | ATC | GCA | CTT | ACC | CTG | TTA | GGC          | TGC | GGC | GGT | GGA | GAA | AGC | GGC | AAT | TCG | GGC | AAC | ACA | ACA | CCA | [ 90]  |        |
| 3528-08 | ... | ... | ... | ...         | ... | ... | ... | ... | ... | ... | ... | ... | ... | ... | ... | ...          | ... | ... | ... | ... | ... | ... | ... | ... | ... | ... | ... | ... | ... | ... | [ 90]  |        |
| 3566-08 | CCG | GTT | AAG | TAC         | TTT | AAT | GTA | AGC | TTT | TTG | GAT | TTA | GAC | AAT | ATA | GCT          | ATC | AAT | ACA | CAA | ACT | AAC | TGT | CAA | ATC | TTT | GGT | TAT | AAC | GAA | [ 180] |        |
| 3528-08 | ... | ... | ... | ...         | ... | ... | ... | ... | ... | ... | ... | ... | ... | ... | ... | ...          | ... | ... | ... | ... | ... | ... | ... | ... | ... | ... | ... | ... | ... | ... | [ 180] |        |
| 3566-08 | GAT | CAA | ACT | AAA         | AAG | ATC | GTG | GCA | TAT | CGC | TCT | GCC | CCT | GAA | AAT | AAT          | TAT | CAA | ATT | GTT | GTT | CAT | GAT | GAA | CAT | GGA | AAT | TTT | GTT | CGT | [ 270] |        |
| 3528-08 | ... | ... | ... | ...         | ... | ... | ... | ... | ... | ... | ... | ... | ... | ... | ... | ...          | ... | ... | ... | ... | ... | ... | ... | ... | ... | ... | ... | ... | ... | ... | [ 270] |        |
| 3566-08 | CGT | TAT | AGT | AAT         | AGC | ACT | GAA | ACG | AAT | GGT | CTA | AGC | TCA | ACT | TTC | CGT          | TTT | CGA | CAA | AGT | GAT | GTC | CCA | CAA | AAT | GGA | TAT | GTA | AGT | TTT | [ 360] |        |
| 3528-08 | ... | ... | ... | ...         | ... | ... | ... | ... | ... | ... | ... | ... | ... | ... | ... | ...          | ... | ... | ... | ... | ... | ... | ... | ... | ... | ... | ... | ... | ... | ... | [ 360] |        |
| 3566-08 | GTC | TAC | TCA | GAA         | GGT | AGA | GAT | AAT | TTT | GTA | AGT | ACA | TAT | TCT | AAA | GAT          | TTC | ATT | CCA | GAA | AGT | TTT | TCT | ATC | TAC | GCC | AAA | AAT | AAA | AAT | [ 450] |        |
| 3528-08 | ... | ... | ... | ...         | ... | ... | ... | ... | ... | ... | ... | ... | ... | ... | ... | ...          | ... | ... | ... | ... | ... | ... | ... | ... | ... | ... | ... | ... | ... | ... | [ 450] |        |
| 3566-08 | AAT | AAC | TCT | AAC         | TGT | TTA | TCT | ATA | GGT | TCC | GGC | AAT | AAT | AGC | AAC | CCG          | CAA | ACA | AGT | GAT | TAC | AAG | TCA | TTT | ATT | CAC | ATC | CCT | GAT | GAA | [ 540] |        |
| 3528-08 | ... | ... | ... | ...         | ... | ... | ... | ... | ... | ... | ... | ... | ... | ... | ... | ...          | ... | ... | ... | ... | ... | ... | ... | ... | ... | ... | ... | ... | ... | ... | [ 540] |        |
| 3566-08 | AAT | AAA | CTT | TTC         | TTT | TTC | TCA | CTC | AAT | CAC | TTT | AAT | CAG | TTA | TCC | TTC          | GAG | CCC | ACT | AAT | AAA | CTA | GGT | AGA | GAT | GTA | TCT | GTG | AAT | TCT | [ 630] |        |
| 3528-08 | ... | ... | ... | ...         | ... | ... | ... | ... | ... | ... | ... | ... | ... | ... | ... | ...          | ... | ... | ... | ... | ... | ... | ... | ... | ... | ... | ... | ... | ... | ... | [ 630] |        |
| 3566-08 | AGA | AGG | GGG | AGA         | CCA | CTA | TTA | TTA | ACC | GCT | TAT | GAG | CGA | ACA | AAT | CAG          | GAC | GTT | ATA | CAA | AAT | CTT | TTT | AGC | TTT | AAA | TTT | AGA | GCT | ACC | [ 720] |        |
| 3528-08 | ... | ... | ... | ...         | ... | ... | ... | ... | ... | ... | ... | ... | ... | ... | ... | ...          | ... | ... | ... | ... | ... | ... | ... | ... | ... | ... | ... | ... | ... | ... | [ 720] |        |
| 3566-08 | AAT | GCA | TTA | GGA         | AGC | CTT | GGG | CAA | GAA | ATT | GAC | CTT | GAT | ATT | ATT | GAT          | CAA | AGA | GAC | ACT | CCA | TGG | ACT | GTA | CCT | TCT | GAT | GTA | GAG | TTA | [ 810] |        |
| 3528-08 | ... | ... | ... | ...         | ... | ... | ... | ... | ... | ... | ... | ... | ... | ... | ... | ...          | ... | ... | ... | ... | ... | ... | ... | ... | ... | ... | ... | ... | ... | ... | [ 810] |        |
| 3566-08 | TCA | TCA | GCT | CAA         | CTA | TTT | GTT | GAT | GGA | AAG | CAA | TTT | AAT | GCT | CCT | TAT          | GCT | TAT | TTA | TGG | CAA | TCA | TTA | AAT | ACA | TCT | TCT | GAA | GAT | AAA | [ 900] |        |
| 3528-08 | ... | ... | ... | ...         | ... | ... | ... | ... | ... | ... | ... | ... | ... | ... | ... | ...          | ... | ... | ... | ... | ... | ... | ... | ... | ... | ... | ... | ... | ... | ... | [ 900] |        |
| 3566-08 | TAT | AGT | TAC | TCA         | AAC | TTA | ATC | AAT | GTA | GAT | AAC | TAT | TAC | TTA | AAA | CTA          | AAA | GGA | AAA | GAA | ATT | -CC | CCC | CCA | TCA | TCC | CCT | TAT | TGG | AAA | [ 990] |        |
| 3528-08 | ... | ... | ... | ...         | ... | ... | ... | ... | ... | ... | ... | ... | ... | ... | ... | ...          | ... | ... | ... | ... | ... | -C  | ... | ... | ... | ... | ... | ... | ... | ... | [ 990] |        |
| 3566-08 | TTT | CAA | CAT | GT <b>C</b> | TCA | AGA | GGG | ACA | AGT | TCA | ATT | ACT | AGC | CAT | TTA | A-           | --- | --- | --- | --- | --- | --- | --- | --- | --- | --- | --- | --- | --- | --- | [1080] |        |
| 3528-08 | ... | ... | ... | .. <b>T</b> | ... | ... | ... | ... | ... | ... | ... | ... | ... | ... | ... | .. <b>GT</b> | GCT | GAA | AAT | ATT | CTA | GAT | GGC | TTT | CCT | AAT | CCA | GAG | CCA | CCA | [1080] |        |
| 3566-08 | --- | --- | --- | ---         | --- | --- | --- | --- | --- | --- | --- | --- | --- | --- | --- | ---          | --- | --- | --- | --- | --- | --- | --- | --- | --- | --- | --- | --- | --- | --- | ---    | [1170] |
| 3528-08 | ACA | TTG | GGG | ATA         | TGT | AAT | GAT | CAC | AAC | AAT | ACA | CAA | TGT | ATT | AAA | ATT          | ACT | CAT | ACT | CAA | AAA | ACC | GAT | AAT | ACA | ATT | CTA | AGG | TTA | CTG | [1170] |        |
| 3566-08 | --- | --- | --- | ---         | --- | --- | --- | --- | --- | --- | --- | --- | --- | --- | --- | ---          | --- | --- | --- | --- | --- | --- | --- | --- | --- | --- | --- | --- | --- | --- | ---    | [1260] |
| 3528-08 | ATT | GAT | TCA | GAA         | TTA | ACT | GTA | CCC | AGC | GGA | TTG | CCC | ATA | TTT | ATA | AAA          | CAA | ACT | ATC | TAT | AGC | CCA | TAT | CAT | AAC | GAG | CTA | CCT | GTT | ATG | [1260] |        |
| 3566-08 | --- | --- | --- | ---         | --- | --- | --- | --- | --- | --- | --- | --- | --- | --- | --- | ---          | --- | --- | --- | --- | --- | --- | --- | --- | --- | --- | --- | --- | --- | --- | ---    | [1350] |
| 3528-08 | AAA | TTT | GAT | AGT         | CCA | ATC | TTA | GAT | CAA | GAA | CTA | AAA | GAG | ATT | AAA | GAT          | TTT | TCA | GTT | TCT | TGG | ATA | AAA | ACA | CCG | TCA | AGT | TCT | ATA | ACA | [1350] |        |
| 3566-08 | --- | --- | --- | ---         | --- | --- | --- | --- | --- | --- | --- | --- | --- | --- | --- | ---          | --- | --- | --- | --- | --- | --- | --- | --- | --- | --- | --- | --- | --- | --- | ---    | [1440] |
| 3528-08 | GAA | ACT | TTT | TTA         | TAT | CAA | TAT | CAA | GAT | CTC | TAT | AAG | CGA | ACT | CTG | GGC          | TCT | GAA | CTA | ATT | GAT | CCT | TCT | ATA | GAT | AAC | ATC | CCA | CTC | CTA | [1440] |        |
| 3566-08 | --- | --- | --- | ---         | --- | --- | --- | --- | --- | --- | --- | --- | --- | --- | --- | ---          | --- | --- | --- | --- | --- | --- | --- | --- | --- | --- | --- | --- | --- | --- | ---    | [1518] |
| 3528-08 | AAA | AAC | ATC | TCT         | GCC | CAG | CAA | GAT | CAA | CAA | GAC | TTG | CTG | AAA | CGC | CAA          | CCT | TAT | ACG | TGG | GTA | TGG | TTA | GAA | GAA | TAA | --- | --- | --- | --- | [1518] |        |

**FIG S4.** Nucleotide alignment of the *pglJ* gene (1098 bp) from the O141 reference strain (3566-08) compared to a sequence from the putative O-antigen gene of the NAG strain (3528-08). Mutations in the NAG O-antigen gene occur at positions 1031 bp (T>C) and 1085 bp (T>C). “.” = indicates identical bases and “-;” indicates an indel.

```

3566-08 GTG GAT GTA GTA AGA AAT AAA ATA ACC CTT TTC ATC AGC TCT CTC GCT GGT GGT GGT AGT GAA GGT GTC TGT GTT AAC GTC GCT AAT GGT [ 90]
3528-08 ... .. [ 90]

3566-08 TTG GCT GAT CAT GGT TGG CAA GTT GAT TTG GTT GTT TTA CAC ACT AAT AAT TCA GCT TAT TTA AAG CGC GTA AGT CAC AAA GTA AAC TTA [ 180]
3528-08 ... .. [ 180]

3566-08 GTC GTG TTG GGG GTT GAC CAT GCT CGC CAT GCA CCG TTG CCA TTA TTA CGC TAT ATC CGT CAG CAT AAA CCT GAA AAA ATG CTC GTA TTT [ 270]
3528-08 ... .. [ 270]

3566-08 AAT TAC GAG TTA GCG GTG TTA GCG GTT ATG TTG CGT AGT TTA TTT CGT TTT AAA ACT AAA ATT ATT GCC AGA AAT ATT AAT ACT TTT TCA [ 360]
3528-08 ... .. [ 360]

3566-08 AAA AAC ACA ACT CAG CCA CAA GGG ATC TGG CAA CGT TAT ATT GTT ACA CCT TTG ATT AAC CAT TTT TAT GGT AAA TGT GAC CAT ATA ATC [ 450]
3528-08 ... .. [ 450]

3566-08 AAC CAA TGC CAA GCG ATG CGC GAT GAC TTA ATC TCA GTA TTT CCC AAT TTG GCG GAT AAA ACT AGC GTG ATT TAT AAT CCA GTC GCA AAG [ 540]
3528-08 ... .. [ 540]

3566-08 CAC GTT GAA GAT TAT GCA AAA GCG TAC GAT TTA ACC CAA GTG GAA AAA CAA GAT TAC TTG CTT TGT GTC GGA AGG TTA GAA AAA CAA AAA [ 630]
3528-08 ... .. [ 630]

3566-08 GCC TTT CAC TAT GCC ATC GAG GGC TTT GCC GGC ATT GCC AAT GAT TTT CCA ACC CTA CGG CTA AAA ATT GTC GGA CAA GGA AGT TTA GAG [ 720]
3528-08 ... .. [ 720]

3566-08 CAG TCA CTA AAG CAA TGC GCA CAG GAT TTG GGT GTT GCC GAT AGG GTT GAT TTT GAA GGT TTT CAA GCG GAT ATG ATC CCT TAT TAT CTT [ 810]
3528-08 ... .. [ 810]

3566-08 CAT GCA AAA GCC ACA TTA CTC ACT TCA CTT TAT GAA GGT TTC CCA AAC GTA TTG ATA GAA TCC ATC ACC TTA GGC ACT CCT GTG GTT GCG [ 900]
3528-08 ... .. [ 900]

3566-08 TTT GAC TGC CCA AGT GGC CCG AGA GAA ATT ATT CAA GAG GGA GTG AAT GGG TAT TTG GCT GAT TAT CAG TTA GTA GCT TCT TTA GAG AGA [ 990]
3528-08 ... .. [ 990]

3566-08 AAA TGT AGA CTA GTT TTG GAG GAT AAA ATA GAT AAT GTT TTA GTT CGA GCT TCA GCA AGT GGT TAT CAA GTG GCT ACA TTT ATA TTA TCT [1080]
3528-08 ... .. [1080]

3566-08 TTA ATA AAA GTT ATA TAA [1098]
3528-08 ... .c. [1098]

```
